# Supplementary material for: Synthesis and biological evaluation of triazole based uracil derivatives as novel DPP-4 inhibitors
Source: Royal Society of Chemistry journal article supplement (doi:10.1039/c6ob01818a), 2016-01-01

## Supplementary Information

### Synthesis and Biological Evaluation of Triazole Based Uracil Derivatives as Novel DPP-4 inhibitors

Qing Li,<sup>#a,b</sup> Li Han,<sup>#a</sup> Bin Zhang,<sup>c</sup> Jinpei Zhou<sup>c</sup> and Huibin Zhang<sup>a\*</sup>

a. Center of Drug Discovery, Jiangsu Key Laboratory of Drug Discovery for Metabolic Disease, China Pharmaceutical University, 24 Tongjiaxiang, Nanjing, Jiangsu 210009, China. E-mail: zhanghb80@cpu.edu.cn

b. Pharmaceutical College, Guangxi Medical University, Nanning, Guangxi, PR China.

c. Department of Medicinal Chemistry, China Pharmaceutical University, 24 Tongjia Xiang, Nanjing 210009, PR China.

Fax: +86 25 83271480; Tel: +86 25 83271302

# These authors contributed equally to this work

1. Copies of <sup>1</sup>H NMR and <sup>13</sup>C NMR figures for selected compounds.....page 2-10

<sup>1</sup>H NMR of compound A01

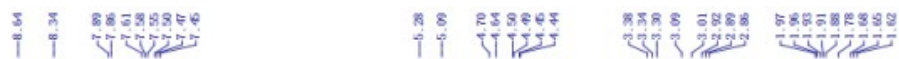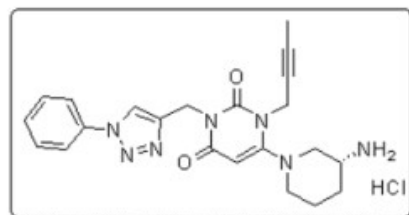

**A01** <sup>1</sup>H NMR AV 300 DMSO-*d*<sub>6</sub>

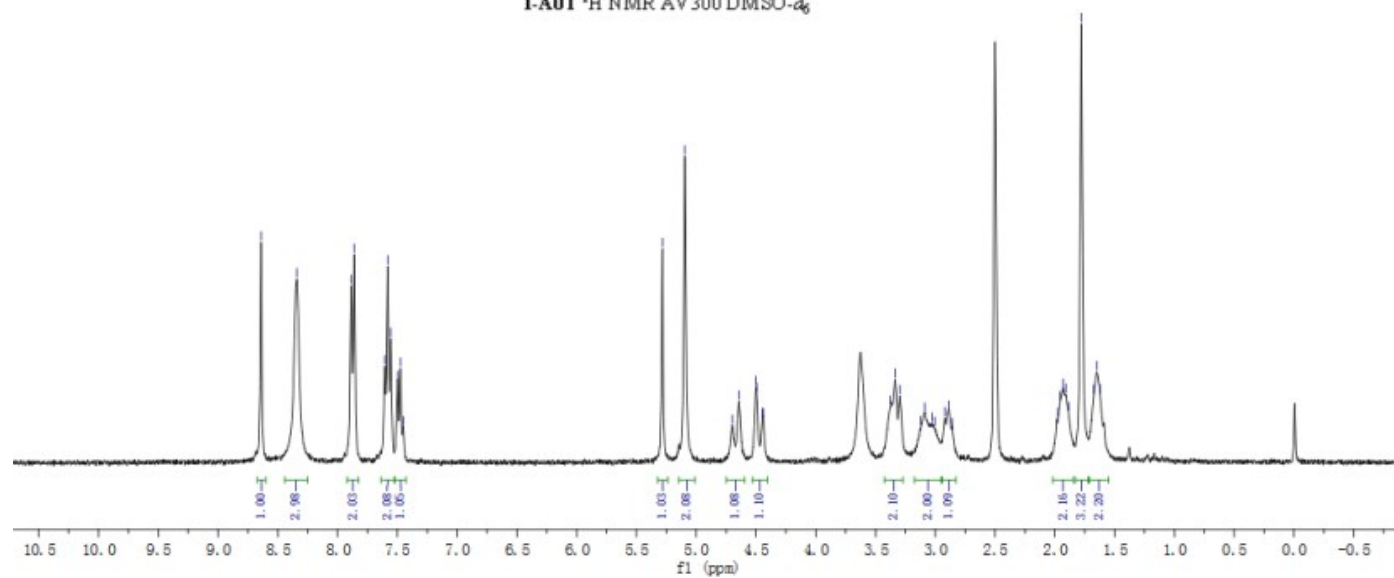

<sup>13</sup>C NMR of compound A01

161.40  
159.04  
151.39  
144.03  
136.51  
129.82  
128.58  
121.45  
119.96  
88.33  
79.72  
74.57  
52.84  
51.41  
45.94  
35.79  
35.50  
26.91  
21.21  
-3.13

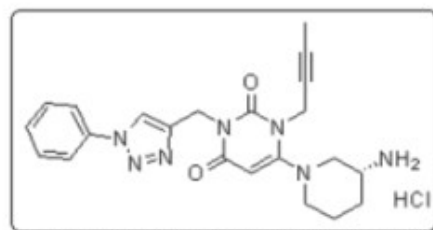

**A01** <sup>13</sup>C NMR AV 300 DMSO-*d*<sub>6</sub>

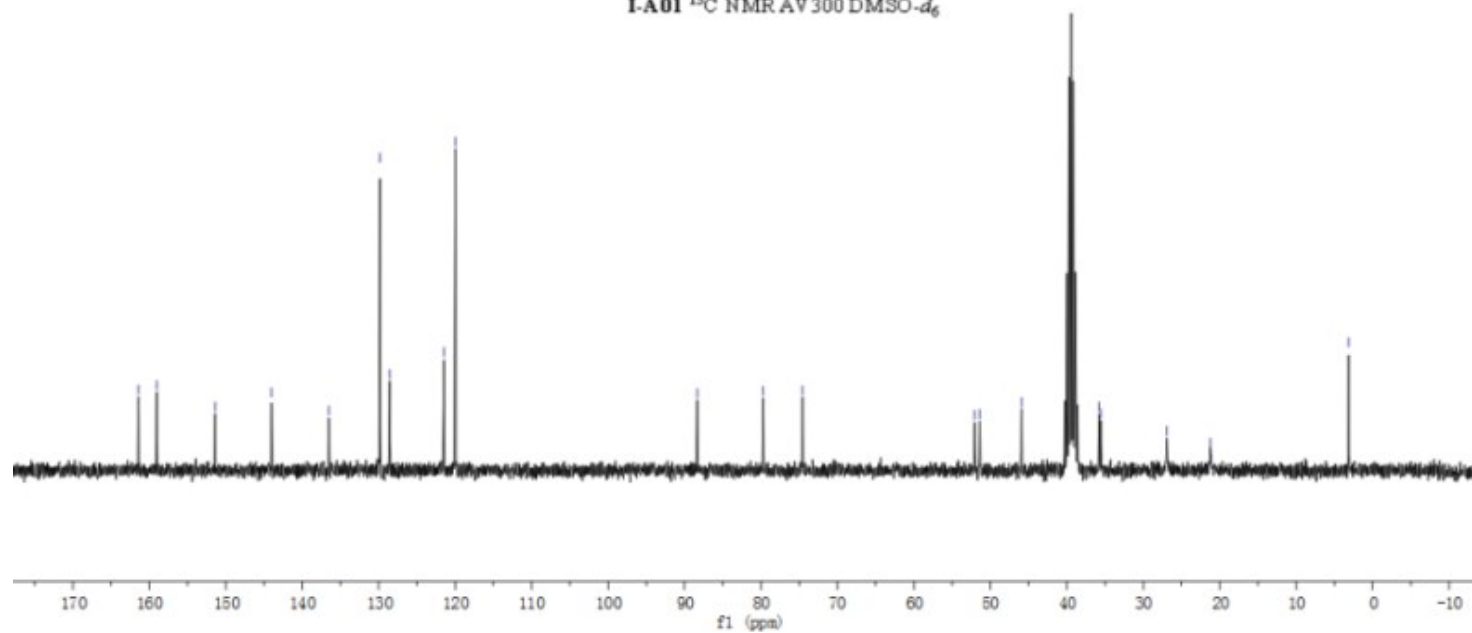

<sup>1</sup>H NMR of compound **B03**

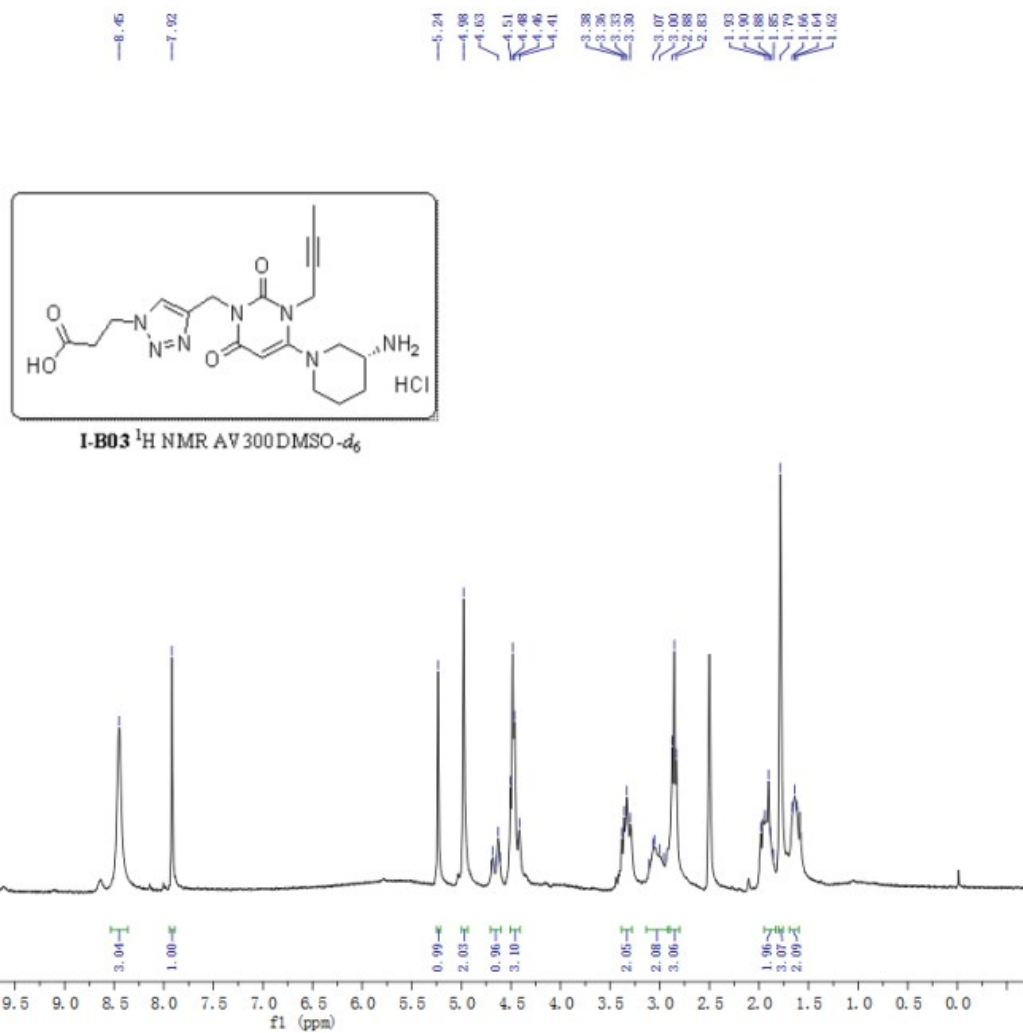

<sup>13</sup>C NMR of compound **B03**

171.74  
161.34  
158.96  
151.28  
142.57

123.57

88.35  
79.72  
74.53

52.87  
51.36  
45.92  
45.23

35.76  
35.46  
33.93  
26.87  
21.26

3.13

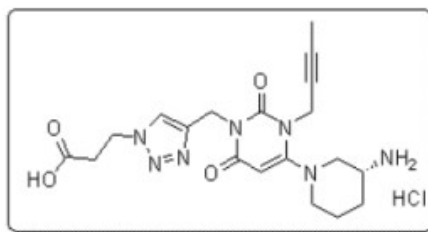

**I-B03** <sup>13</sup>C NMR AV 300 DMSO-d<sub>6</sub>

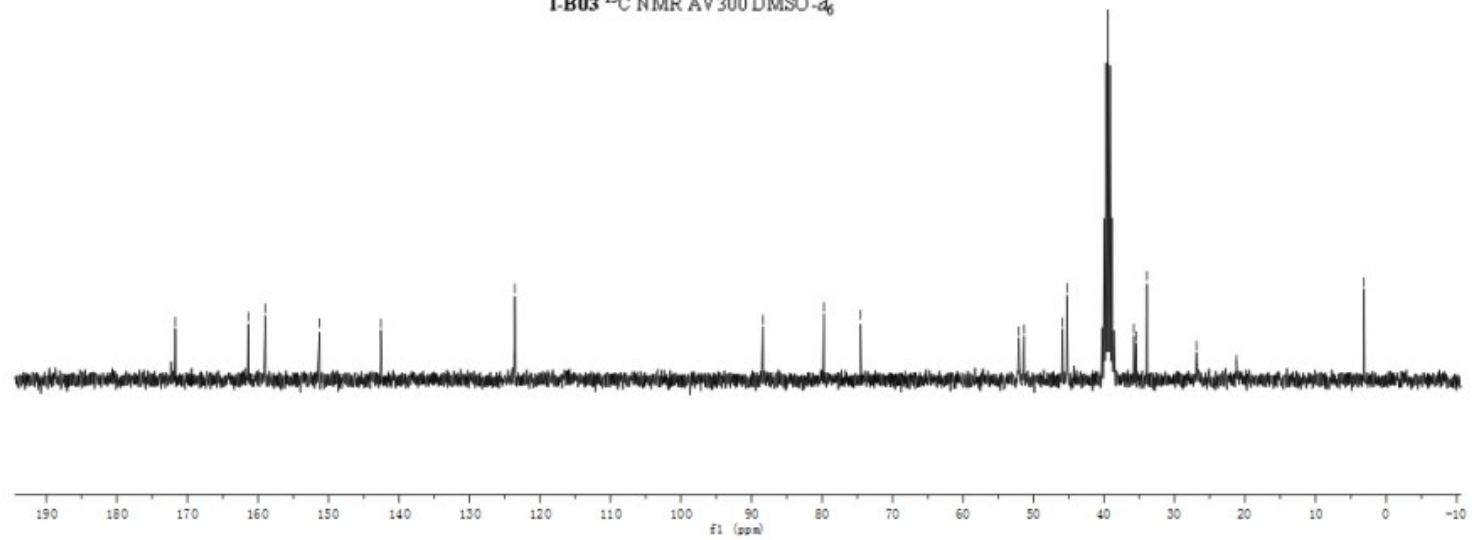

<sup>1</sup>H NMR of compound **B04**

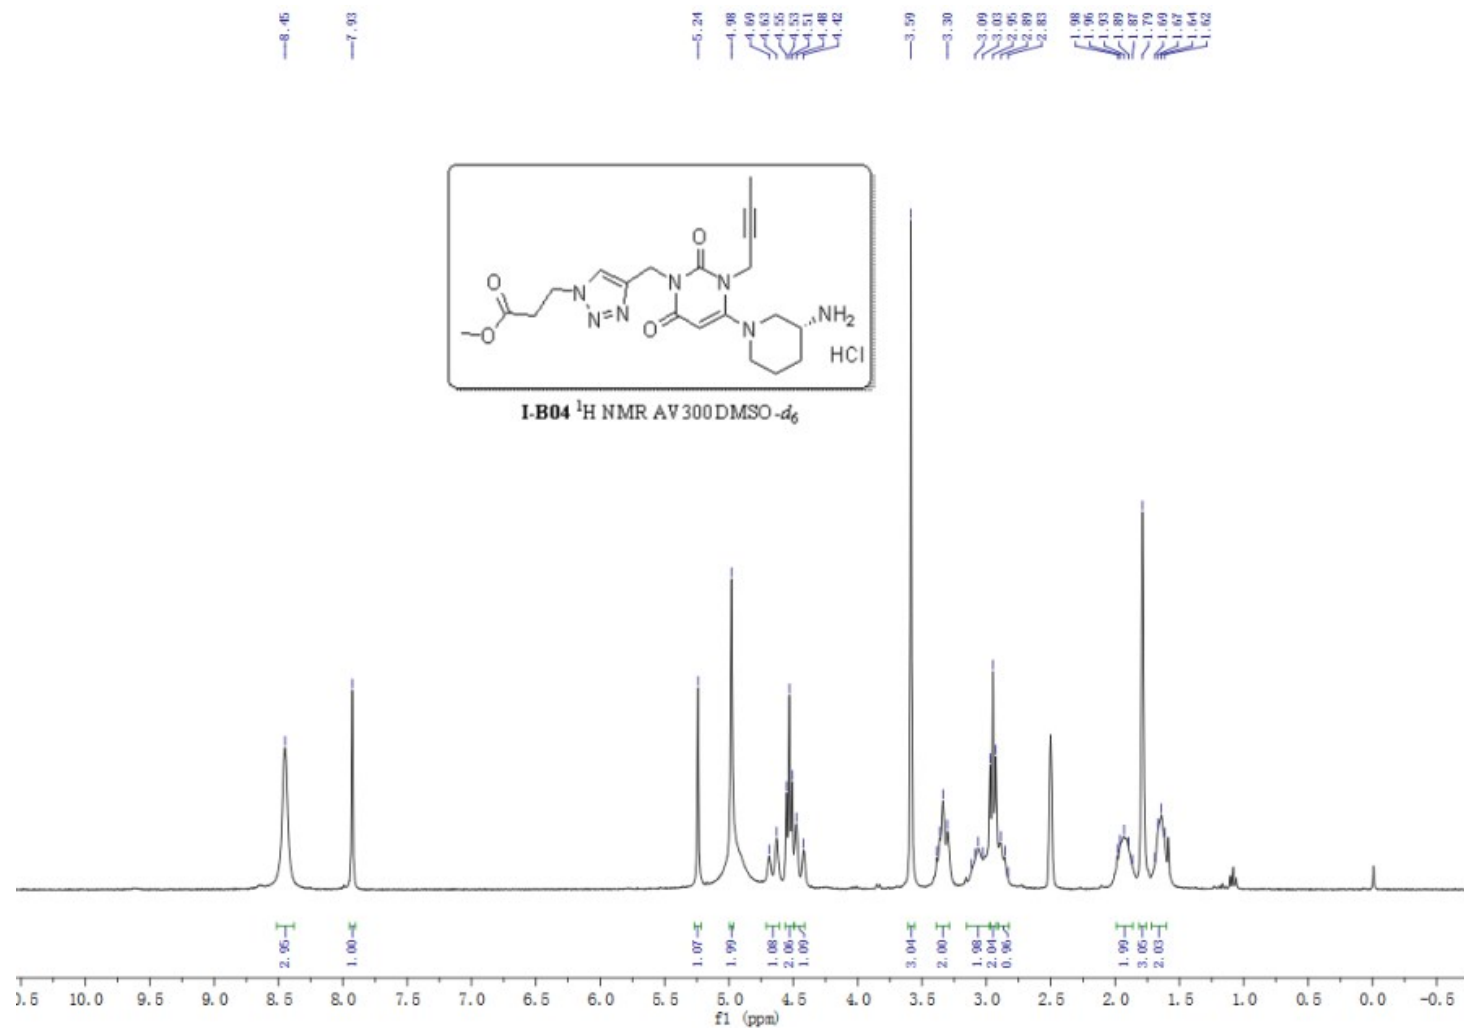

<sup>13</sup>C NMR of compound **B04**

170.76    161.34  
158.97    151.28  
142.60    123.64

88.35    79.72  
74.53

52.06  
51.60  
51.37    45.93  
45.65

35.74  
35.46  
33.62

26.88    21.18

3.14

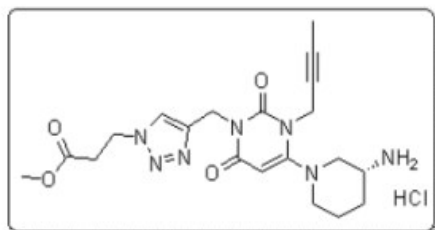

**I-B04** <sup>13</sup>C NMR AV 300 DMSO-*d*<sub>6</sub>

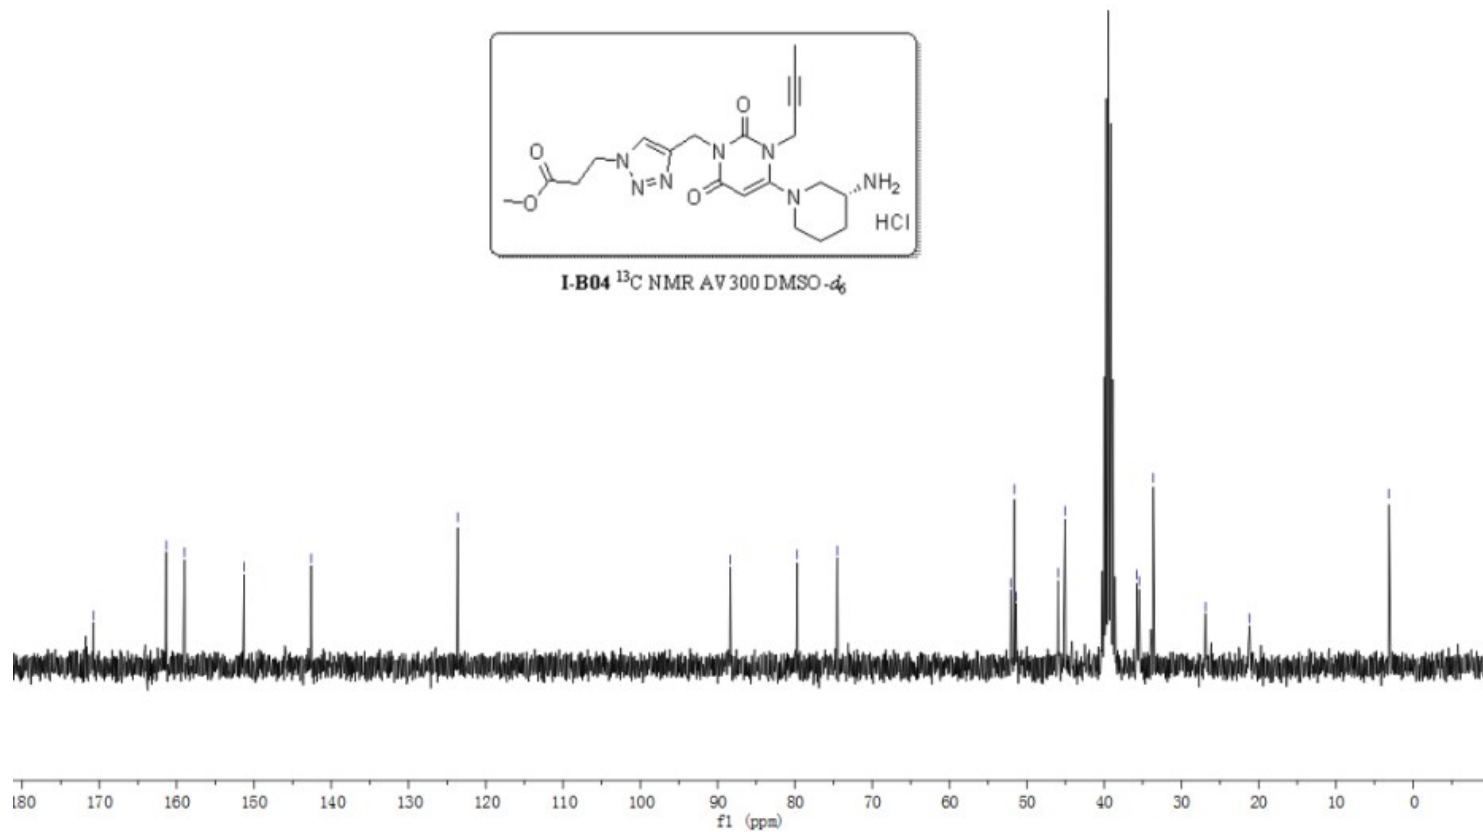

Supplement: c6ob01818a1.pdf [file c6ob01818a1.pdf]
